# Supplementary material
Source: PubMed Central journal article supplement (PMC3193076)
Supplement: NIHMS264501-supplement-Supplementary_Figure_1.pdf [file NIHMS264501-supplement-Supplementary_Figure_1.pdf]

The ProtocolApplication references the standard Protocol that was run

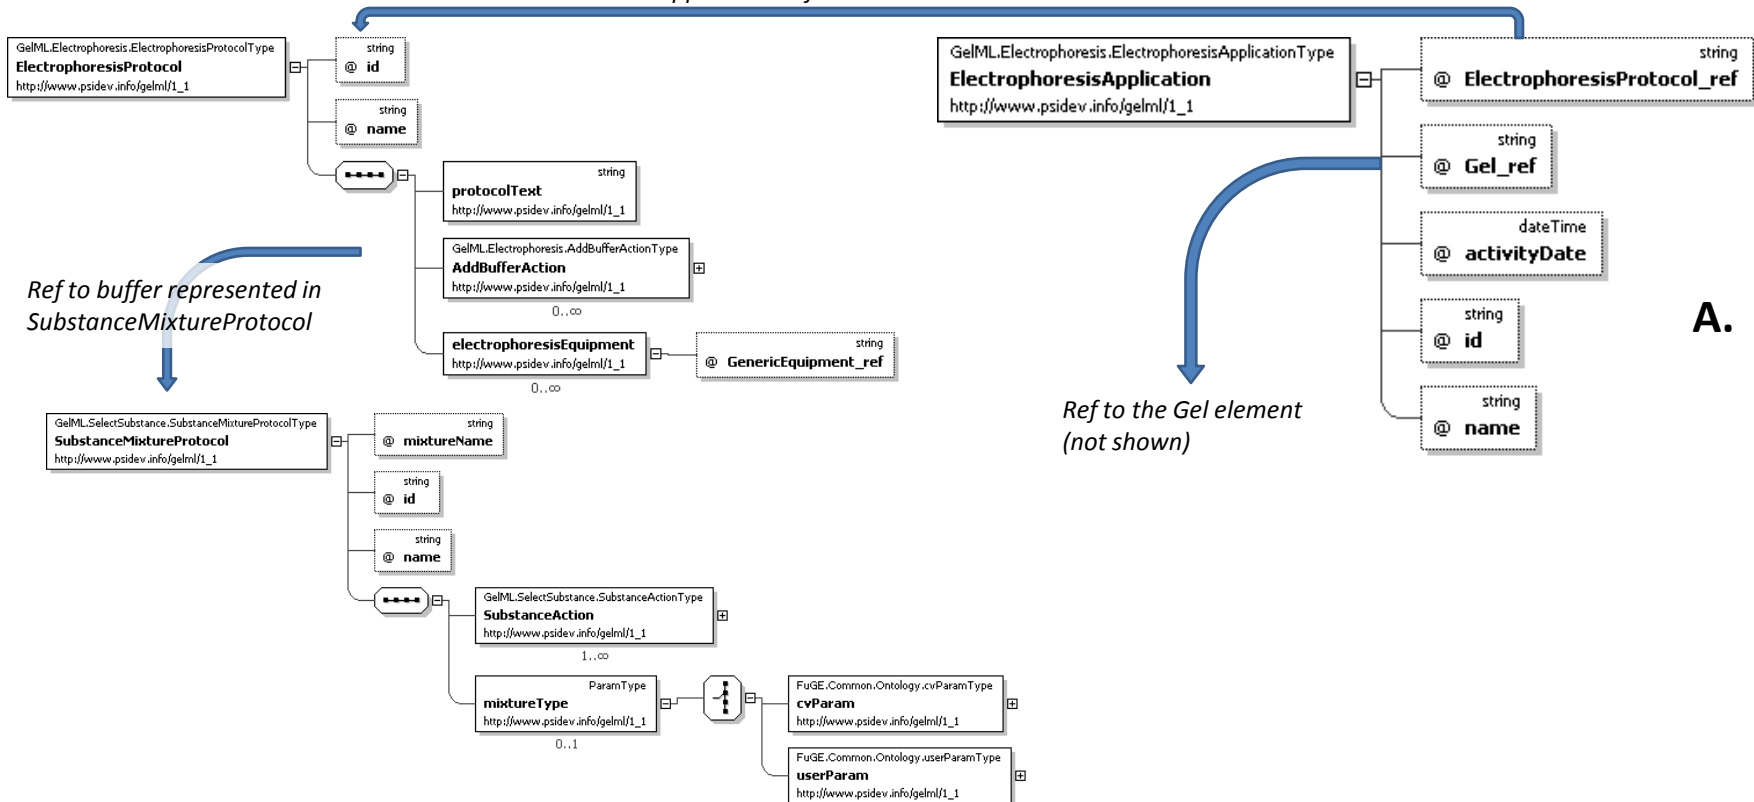

A.

The ProtocolApplication references the standard Protocol that was run

```
<ElectrophoresisProtocol id="805" name="SDS-PAGE electrophoresis protocol">
  <protocolText>2W 30 min; 20W 3:30 hrs</protocolText>
  <AddBufferAction SubstanceMixtureProtocol_ref="electrophoresisBuffer" id="ABA1"/>
</ElectrophoresisProtocol>
```

↓ Ref to buffer represented in SubstanceMixtureProtocol

```
<SubstanceMixtureProtocol id="electrophoresisBuffer"
  mixtureName="LOWER: SDS Electrophoresis Buffer 1x">
  <SubstanceAction id="SA1" substanceName="Tris Base">
    <Concentration id="C1">
      <AtomicValue>
        <PropertyValue unitAccession="UO:0000063" unitCvRef="UO" unitName="millimolar" value="25"/>
      </AtomicValue>
    </Concentration>
  </SubstanceAction>
  <SubstanceAction id="SA2" substanceName="SDS">
    <Concentration id="C2">
      <AtomicValue>
        <PropertyValue unitAccession="UO:0000187" unitCvRef="UO" unitName="percent" value="0.1"/>
      </AtomicValue>
    </Concentration>
  </SubstanceAction>
  <mixtureType>
    <cvParam accession="sep:00121" cvRef="SEP" name="electrophoresis buffer"/>
  </mixtureType>
</SubstanceMixtureProtocol>
```

```
<ElectrophoresisApplication ElectrophoresisProtocol_ref="804"
  id="ElectrophoresisApp108" activityDate="2001-10-26T12:00:00"
  Gel_ref="810"/>
```

↓ Ref to the Gel instance that was run (<Gel> not shown)

B.
