# Supplementary material
Source: PubMed Central journal article supplement (PMC3193076)
Supplement: NIHMS264501-supplement-Supplementary_Figure_2.pdf [file NIHMS264501-supplement-Supplementary_Figure_2.pdf]

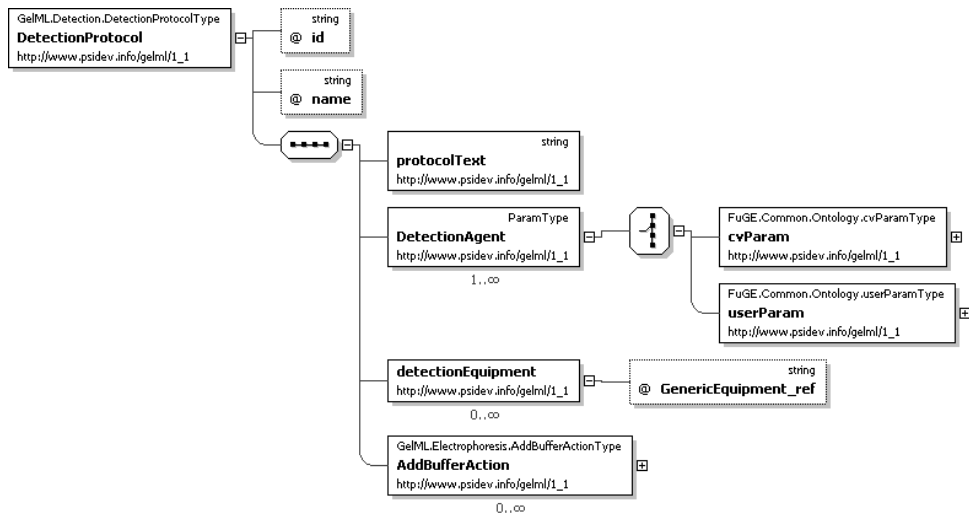

**B.**

```

<DetectionProtocol id="519">
  <protocolText>
    "1 hour in 100 ml 10% Metanol: 7% Acetic Acid with
    agitation"</protocolText>
  <DetectionAgent>
    <cvParam accession="sep:00114" cvRef="SEP" name="Coomassie blue"
    unitAccession="UO:000098" unitCvRef="UO" unitName="milliliter" value="10"/>
  </DetectionAgent>
</DetectionProtocol>

```
