# Supplementary material
Source: PubMed Central journal article supplement (PMC3193076)
Supplement: NIHMS264501-supplement-Supplementary_Figure_4.pdf [file NIHMS264501-supplement-Supplementary_Figure_4.pdf]

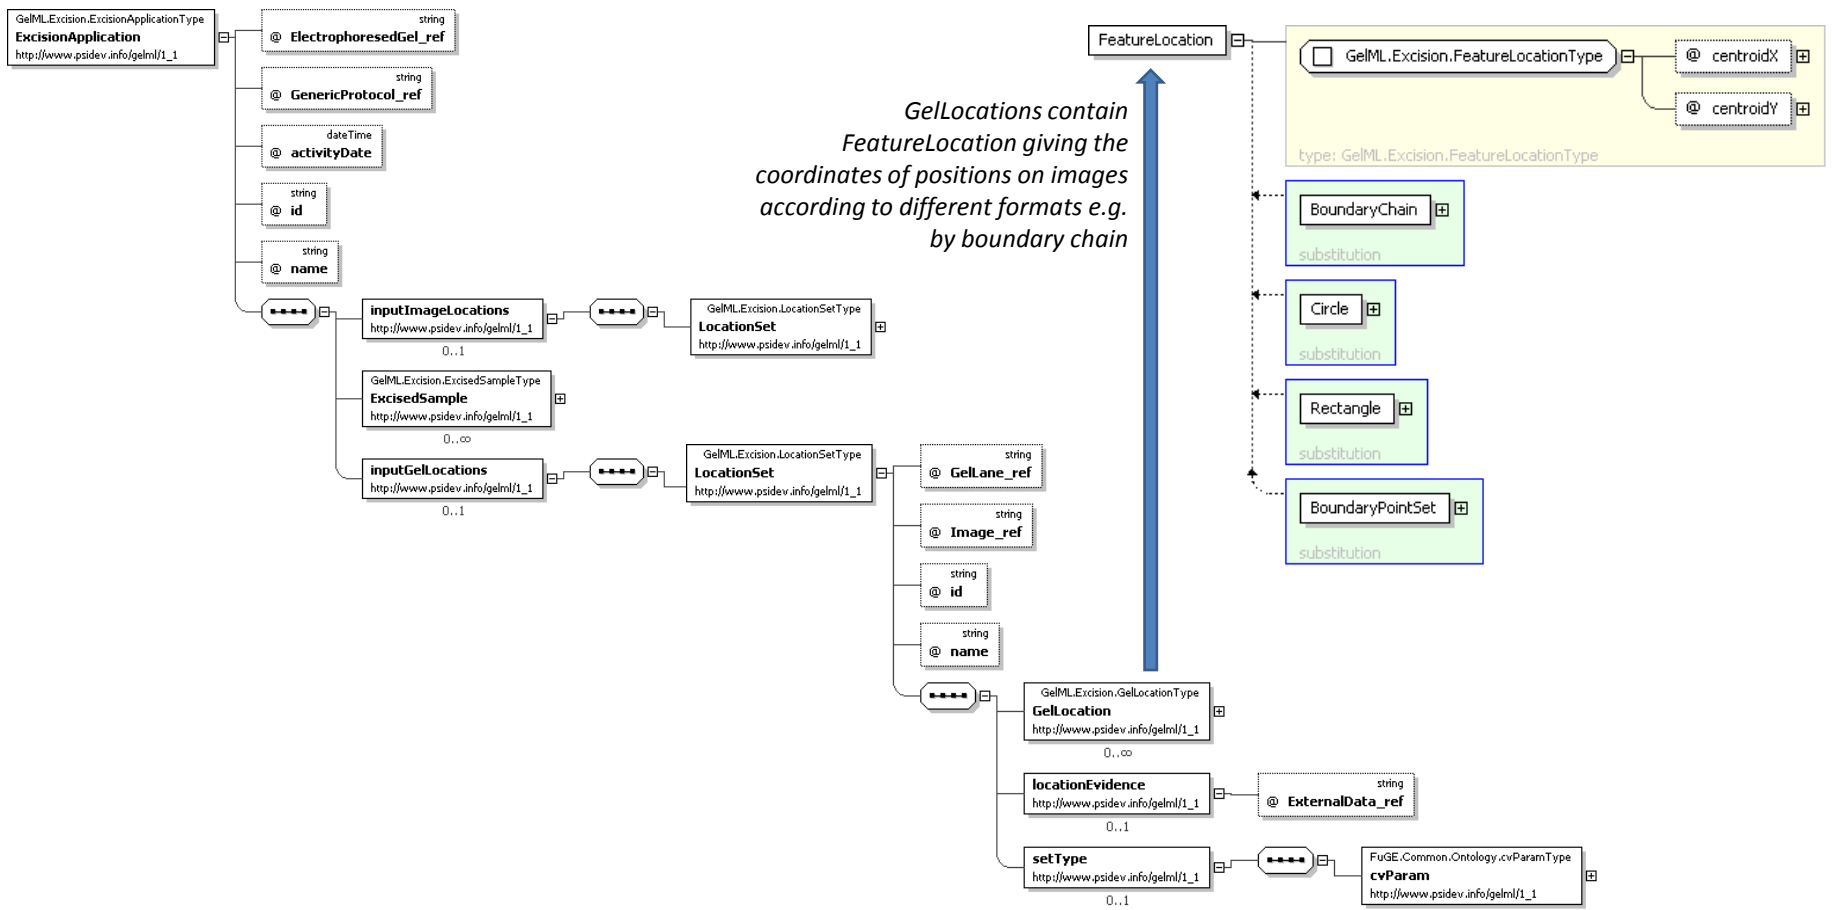

```
<ExcisionApplication ElectrophoresedGel_ref="ex002:Gel2D0"
GenericProtocol_ref="ExcisionProtocol1" id="ExcisionApplication1">
```

```
<ExcisedSample GelLocation_ref="GL1" id="ExcisedSample1"/>
<ExcisedSample GelLocation_ref="GL2" id="ExcisedSample2"/>
<ExcisedSample GelLocation_ref="GL3" id="ExcisedSample3"/>
```

```
<inputGelLocations>
<LocationSet id="LocationSet1" Image_ref="Image1" >
  <GelLocation id="GL1">
    <FeatureLocation centroidX="1234" centroidY="234"/>
  </GelLocation>
  <GelLocation id="GL2">
    <FeatureLocation centroidX="1244" centroidY="244"/>
  </GelLocation>
  <GelLocation id="GL3">
    <FeatureLocation centroidX="1268" centroidY="238"/>
  </GelLocation>
  <setType>
    <cvParam cvRef="sepCV" accession="sep:00194" name="picking gel feature location set"/>
  </setType>
</LocationSet>
</inputGelLocations>
</ExcisionApplication>
```

**B.**

*Entities representing samples excised from gels, for further analysis e.g. by mass spec for identification*

*A reference from an excised sample to the corresponding position on a gel image*
